# Supplementary material
Source: HighWire-hosted journal article supplement (https://www.rcpjournals.org/highwire/filestream/13713/field_highwire_adjunct_files/0/Van_Den_Tooren_Supplementary_material_S1.pdf)
Supplement: Van_Den_Tooren_Supplementary_material_S1.pdf [file Van_Den_Tooren_Supplementary_material_S1.pdf]

## **Supplementary Material S1**

"long-term outcome\*" OR "long-term prognos\*" OR "long-term sequelae\*" OR "long-term effect\*" OR "long-term deficit\*" OR "long-term problem\*" OR "long-term symptom\*" OR "long-term impairment\*" OR "long-term defect\*" OR "persisting defect\*" OR "persisting deficit\*" OR "persisting problem\*" OR "persisting impairment\*" OR "persisting symptom\*" OR "persisting effect\*" OR "persisting outcome\*" OR "persisting sequelae\*" OR "permanent sequelae\*" OR "permanent outcome\*" OR "permanent effect\*" OR "permanent symptom\*" OR "permanent impairment\*" OR "permanent problem\*" OR "permanent defect\*" OR "permanent deficit\*" OR "lasting deficit\*" OR "lasting defect\*" OR "lasting problem\*" OR "lasting impairment\*" OR "lasting symptom\*" OR "lasting outcome\*" OR "lasting sequelae\*" OR "ongoing sequelae\*" OR "ongoing prognos\*" OR "ongoing outcome\*" OR "ongoing symptom\*" OR "ongoing impairment\*" OR "ongoing problem\*" OR "ongoing defect\*" OR "ongoing deficit\*" OR "ongoing effect\*" OR "lasting effect\*" OR "outcome score\*" OR "outcome measure\*" OR "long-term follow-up" Or "ongoing follow up"

AND

encephalit\* OR "brain infect\*" OR "parenchyma\* infect\*" OR "brain inflammat\*" OR "parenchyma\* inflammat\*" or panencephalit\* or meningoencephalit\*
